# Supplementary material for: Diverse Epidemiology of Leptospira Serovars Notified in New Zealand, 1999–2017
Source: MDPI journal article supplement (doi:10.3390/pathogens9100841), 2020-10-14
Supplement: s1 [file s1]

Supplementary Materials

# Diverse epidemiology of *Leptospira* serovars notified in New Zealand, 1999-2017

Shahista Nisa <sup>1</sup>, David A. Wilkinson <sup>2</sup>, Olivia Angelin-Bonnet <sup>3</sup>, Shevaun Paine <sup>4</sup>, Karen Cullen <sup>4</sup>, Jackie Wight <sup>4</sup>, Michael G. Baker <sup>5</sup> and Jackie Benschop <sup>1,6,\*</sup>

<sup>1</sup> Molecular Epidemiology and Public Health Laboratory, Hopkirk Research Institute, School of Veterinary Science, Massey University, Palmerston North, New Zealand; s.nisa@massey.ac.nz

<sup>2</sup> New Zealand Food Safety Science and Research Centre, Massey University, Palmerston North, New Zealand; david.wilkinson@univ-reunion.fr

<sup>3</sup> School of Fundamental Sciences, College of Sciences, Massey University, Palmerston North, New Zealand; Angelin-bonnet@massey.ac.nz

<sup>4</sup> Institute of Environmental Science and Research, Wellington, New Zealand; Shevaun.Paine@esr.cri.nz; karen.cullen@esr.cri.nz; Jackie.Wright@esr.cri.nz

<sup>5</sup> Department of Public Health, University of Otago, Wellington, New Zealand; michael.baker@otago.ac.nz

<sup>6</sup> Global Leptospirosis Environmental Action Network, World Health Organization, Geneva, Switzerland; J.Benschop@massey.ac.nz

\* Correspondence: j.benschop@massey.ac.nz; Tel.: +64 6 359 9099 ext: 83994

Received: date; Accepted: date; Published: date

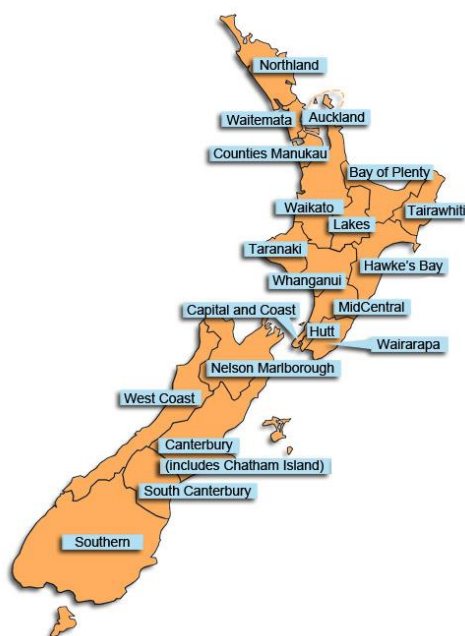

**Figure S1:** Location boundaries for the 20 District Health Board boundaries in New Zealand. Source: Ministry of Health, New Zealand.

28

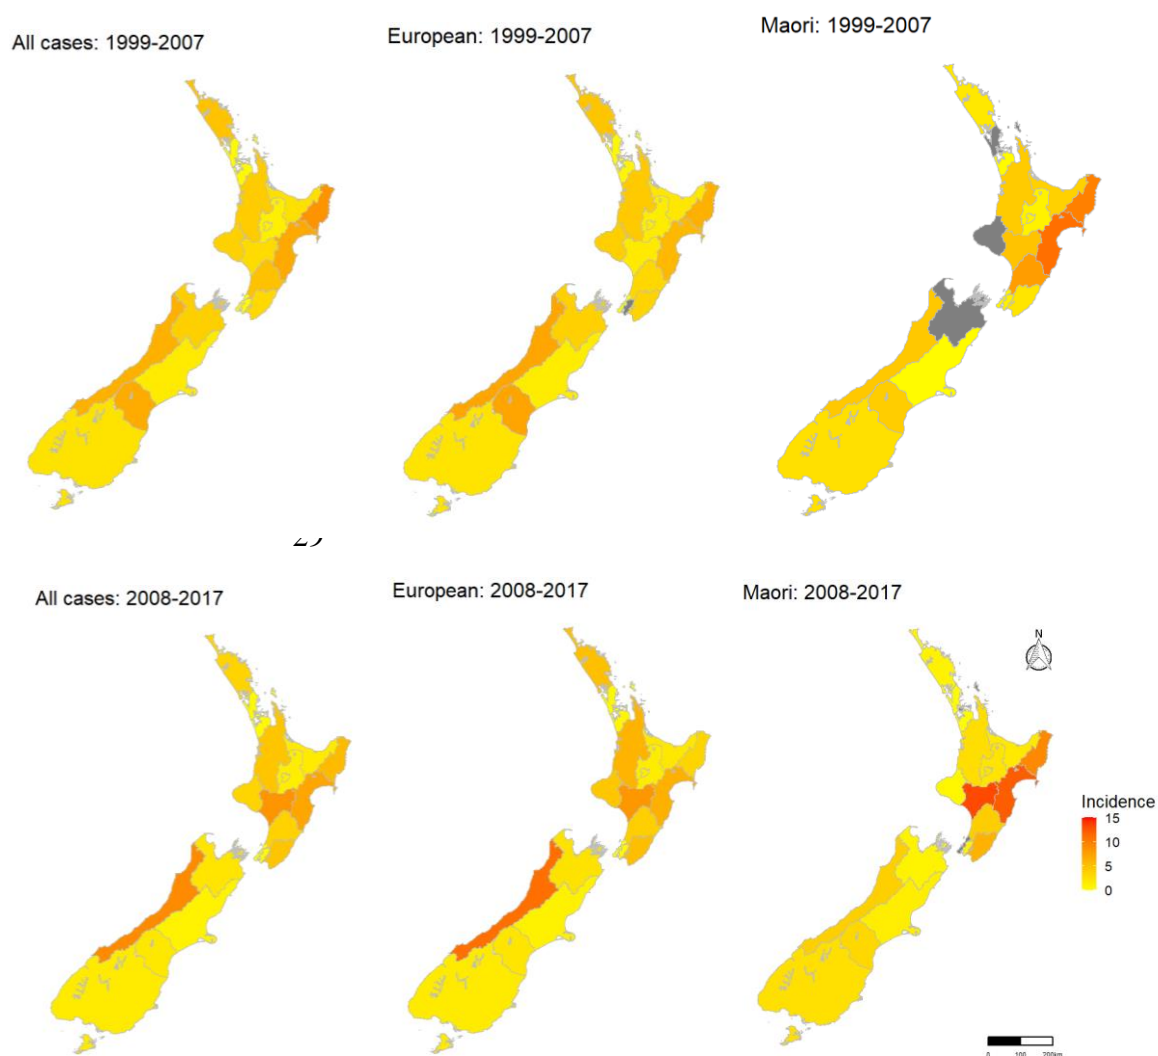

30

31 **Figure S2:** Choropleth maps of early and late study period. Average annual incidence per 100 000 of  
 32 notified leptospirosis cases per District Health Boards in New Zealand for the early (1999-2007) and  
 33 the late (2008-2017) study period for all cases, Europeans cases and Maori cases. Grey indicates DHB  
 34 with no incidences.

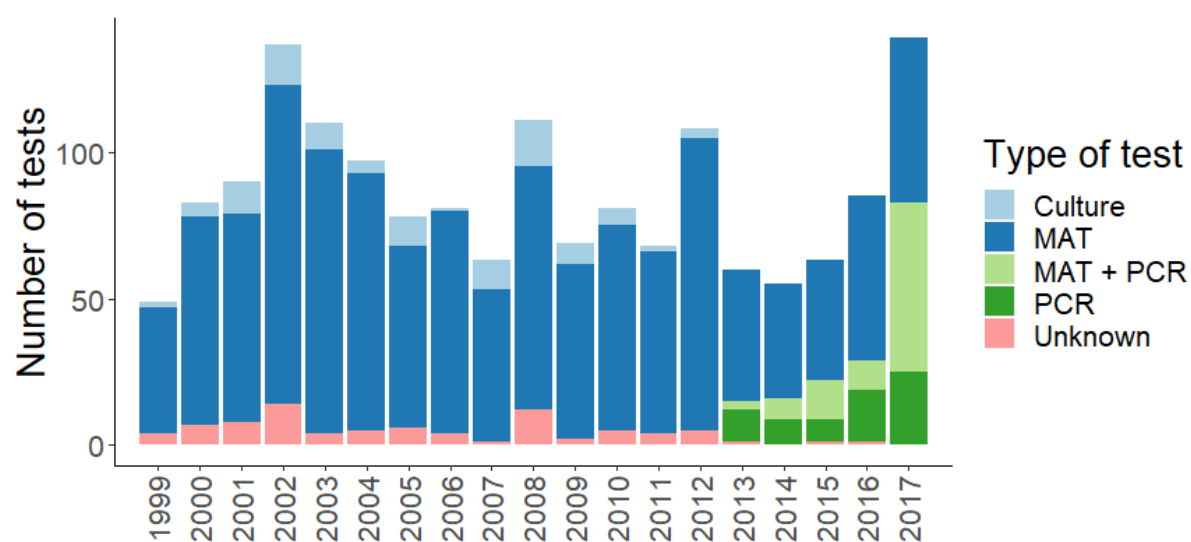

35

36 **Figure S3:** Type of laboratory tests used to diagnose notified confirmed and probable leptospirosis  
37 cases in New Zealand, 1999 to 2017.
